# Supplementary material
Source: publisher site journal article supplement (https://www.dovepress.com/article/402037)
Supplement: Supplementary file 1 [file get_supplementary_file.php]

# Title: Association between bicarbonate and prediabetes and subclinical inflammation in young healthy adults: A cross-sectional study

**Supplementary Table 1** – Association between bicarbonate and prediabetes in females aged 18-29 years, adjusted for BMI -Multivariable logistic regression

| Prediabetes | Odds Ratio | P-value | [95% Conf. Interval] | |
| --- | --- | --- | --- | --- |
| Bicarbonate | 0.99 | 0.905 | 0.80 | 1.21 |
| BMI | 0.99 | 0.871 | 0.93 | 1.07 |
| _cons | 0.15 | 0.516 | 0.00 | 43.34 |

**Supplementary Table 2 –** Association between bicarbonate and prediabetes in males aged 18-29 years, adjusted for BMI- Multivariable logistic regression

| Prediabetes | Odds Ratio | P-value | [95% Conf. Interval] | |
| --- | --- | --- | --- | --- |
| Bicarbonate | 0.82 | 0.167 | 0.62 | 1.09 |
| BMI | 1.03 | 0.510 | 0.95 | 1.12 |
| _cons | 6.41 | 0.661 | 0.002 | 25642.33 |

**Supplementary Table 3** – Association between bicarbonate and prediabetes in females aged 30-40 years, adjusted for BMI- Multivariable logistic regression

| Prediabetes | Odds Ratio | P-value | [95% Conf. Interval] | |
| --- | --- | --- | --- | --- |
| Bicarbonate | 0.92 | 0.598 | 0.67 | 1.26 |
| BMI | 0.997 | 0.951 | 0.91 | 1.10 |
| _cons | 0.66 | 0.922 | 0.0001 | 2915.08 |

**Supplementary Table 4** – Association between bicarbonate and prediabetes in males aged 30-40 years, adjusted for BMI- Multivariable logistic regression

| Prediabetes | Odds Ratio | P-value | [95% Conf. Interval] | |
| --- | --- | --- | --- | --- |
| Bicarbonate | 0.83 | 0.093 | 0.66 | 1.03 |
| BMI | 0.90 | 0.099 | 0.80 | 1.02 |
| _cons | 238.91 | 0.134 | 0.18 | 310194.6 |

**Supplementary Table 5** – Association between bicarbonate and MHR in females aged 18-29 years, adjusted for BMI- Multivariable linear regression

| MHR | Beta Coef. | P-value | [95% Conf. Interval] | |
| --- | --- | --- | --- | --- |
| Bicarbonate | 0.003 | 0.947 | -0.09 | 0.10 |
| BMI | 0.08 | 0.000 | 0.05 | 0.11 |
| _cons | 2.62 | 0.055 | -0.05 | 5.29 |

**Supplementary Table 6** – Association between bicarbonate and MHR in males aged 18-29 years, adjusted for BMI- Multivariable linear regression

| MHR | Beta Coef. | P-value | [95% Conf. Interval] | |
| --- | --- | --- | --- | --- |
| Bicarbonate | -0.07 | 0.430 | -0.23 | 0.10 |
| BMI | 0.04 | 0.160 | -0.02 | 0.09 |
| _cons | 7.19 | 0.005 | 2.18 | 12.19 |

**Supplementary Table 7** – Association between bicarbonate and MHR in females aged 30-40 years, adjusted for BMI- Multivariable linear regression

| MHR | Beta Coef. | P-value | [95% Conf. Interval] | |
| --- | --- | --- | --- | --- |
| Bicarbonate | -0.16 | 0.011 | -0.29 | -0.04 |
| BMI | 0.04 | 0.055 | -0.001 | 0.08 |
| _cons | 7.70 | 0.000 | 4.29 | 11.12 |

**Supplementary Table 8** – Association between bicarbonate and MHR in males aged 30-40 years, adjusted for BMI- Multivariable linear regression

| MHR | Beta Coef. | P-value | [95% Conf. Interval] | |
| --- | --- | --- | --- | --- |
| Bicarbonate | -0.26 | 0.001 | -0.41 | -0.11 |
| BMI | 0.002 | 0.950 | -0.07 | 0.07 |
| _cons | 13.88 | 0.000 | 9.07 | 18.69 |

**Supplementary Table 9** – Association between bicarbonate and ferritin in females, adjusted for BMI and age- Multivariable linear regression

| Ferritin | Beta Coef. | P-value | [95% Conf. Interval] | |
| --- | --- | --- | --- | --- |
| Bicarbonate | 0.91 | 0.248 | -0.64 | 2.45 |
| BMI | 0.41 | 0.108 | -0.09 | 0.91 |
| Age | -3.69 | 0.260 | -10.12 | 2.74 |
| _cons | -8.97 | 0.675 | -50.998 | 33.06 |

**Supplementary Table 10** – Association between bicarbonate and ferritin in males, adjusted for BMI and age- Multivariable linear regression

| Ferritin | Beta Coef. | P-value | [95% Conf. Interval] | |
| --- | --- | --- | --- | --- |
| Bicarbonate | -0.33 | 0.837 | -3.52 | 2.85 |
| BMI | 1.89 | 0.002 | 0.67 | 3.12 |
| Age | 20.98 | 0.003 | 7.04 | 34.93 |
| _cons | 49.51 | 0.324 | -49.05 | 148.08 |

**Supplementary Table 11** – Association between bicarbonate and albumin in females, adjusted for BMI and age- Multivariable linear regression

| Albumin | Beta Coef. | P-value | [95% Conf. Interval] | |
| --- | --- | --- | --- | --- |
| Bicarbonate | 0.10 | 0.071 | -0.01 | 0.21 |
| BMI | -0.19 | 0.000 | -0.23 | -0.16 |
| Age | -0.72 | 0.002 | -1.19 | -0.26 |
| _cons | 47.68 | 0.000 | 44.65 | 50.72 |

**Supplementary Table 12** – Association between bicarbonate and albumin in males, adjusted for BMI and age- Multivariable linear regression

| Albumin | Beta Coef. | P-value | [95% Conf. Interval] | |
| --- | --- | --- | --- | --- |
| Bicarbonate | 0.20 | 0.000 | 0.10 | 0.31 |
| BMI | -0.14 | 0.000 | -0.18 | -0.10 |
| Age | -1.08 | 0.000 | -1.53 | -0.63 |
| _cons | 45.63 | 0.000 | 42.45 | 48.81 |

**Supplementary Table 13** – Association between bicarbonate and HOMA-IR in females, adjusted for BMI and age- Multivariable linear regression

| HOMA-IR | Beta Coef. | P-value | [95% Conf. Interval] | |
| --- | --- | --- | --- | --- |
| Bicarbonate | -0.002 | 0.905 | -0.04 | 0.03 |
| BMI | 0.05 | 0.000 | 0.04 | 0.06 |
| Age | -0.12 | 0.129 | -0.27 | 0.03 |
| _cons | 0.26 | 0.608 | -0.74 | 1.26 |

**Supplementary Table 14** – Association between bicarbonate and HOMA-IR in males, adjusted for BMI and age- Multivariable linear regression

| HOMA-IR | Beta Coef. | P-value | [95% Conf. Interval] | |
| --- | --- | --- | --- | --- |
| Bicarbonate | -0.04 | 0.053 | -0.08 | 0.001 |
| BMI | 0.05 | 0.000 | 0.04 | 0.07 |
| Age | 0.10 | 0.297 | -0.09 | 0.28 |
| _cons | 1.21 | 0.066 | -0.08 | 2.51 |

**Supplementary Table 15** – Association between bicarbonate and insulin resistance in females, adjusted for BMI and age- Multivariable logistic regression

| Insulin Resistance | Odds Ratio | P-value | [95% Conf. Interval] | |
| --- | --- | --- | --- | --- |
| Bicarbonate | 0.96 | 0.402 | 0.86 | 1.06 |
| BMI | 1.02 | 0.190 | 0.99 | 1.06 |
| Age | 0.89 | 0.592 | 0.57 | 1.37 |
| _cons | 0.69 | 0.800 | 0.04 | 11.75 |

**Supplementary Table 16** – Association between bicarbonate and insulin resistance in males, adjusted for BMI and age- Multivariable logistic regression

| Insulin Resistance | Odds Ratio | P-value | [95% Conf. Interval] | |
| --- | --- | --- | --- | --- |
| Bicarbonate | 0.95 | 0.388 | 0.85 | 1.07 |
| BMI | 0.98 | 0.494 | 0.94 | 1.03 |
| Age | 1.54 | 0.101 | 0.92 | 2.59 |
| _cons | 1.35 | 0.872 | 0.04 | 49.97 |

**Supplementary Table 17** – Association between bicarbonate and c-peptide in females, adjusted for BMI and age- Multivariable linear regression

| C-peptide | Beta Coef. | P-value | [95% Conf. Interval] | |
| --- | --- | --- | --- | --- |
| Bicarbonate | -0.005 | 0.875 | -0.06 | 0.05 |
| BMI | 0.07 | 0.000 | 0.06 | 0.09 |
| Age | -0.10 | 0.385 | -0.34 | 0.13 |
| _cons | 0.23 | 0.767 | -1.31 | 1.77 |

**Supplementary Table 18** – Association between bicarbonate and c-peptide in males, adjusted for BMI and age- Multivariable linear regression

| C-peptide | Beta Coef. | P-value | [95% Conf. Interval] | |
| --- | --- | --- | --- | --- |
| Bicarbonate | -0.04 | 0.190 | -0.11 | 0.02 |
| BMI | 0.08 | 0.000 | 0.06 | 0.10 |
| Age | 0.22 | 0.118 | -0.06 | 0.51 |
| _cons | 1.07 | 0.291 | -0.92 | 3.06 |

**Supplementary Table 19** – Association between bicarbonate and glucose in females, adjusted for BMI and age- Multivariable linear regression

| Glucose | Beta Coef. | P-value | [95% Conf. Interval] | |
| --- | --- | --- | --- | --- |
| Bicarbonate | 0.001 | 0.892 | -0.02 | 0.02 |
| BMI | 0.01 | 0.001 | 0.01 | 0.02 |
| Age | -0.04 | 0.348 | -0.13 | 0.04 |
| _cons | 4.47 | 0.000 | 3.92 | 5.03 |

**Supplementary Table 20** – Association between bicarbonate and glucose in males, adjusted for BMI and age

| Glucose | Beta Coef. | P-value | [95% Conf. Interval] | |
| --- | --- | --- | --- | --- |
| Bicarbonate | -0.02 | 0.122 | -0.04 | 0.004 |
| BMI | 0.01 | 0.002 | 0.005 | 0.02 |
| Age | 0.14 | 0.002 | 0.05 | 0.23 |
| _cons | 4.98 | 0.000 | 4.34 | 5.63 |
